# Supplementary material for: Selectivity of CO2via pore space partition in zeolitic boron imidazolate frameworks
Source: Royal Society of Chemistry journal article supplement (doi:10.1039/c6cc00185h), 2016-01-01
Supplement: c6cc00185h1.pdf [file c6cc00185h1.pdf]

## SUPPORTING INFORMATION

### Selectivity of CO<sub>2</sub> via Pore Space Partition in Zeolitic Boron

#### Imidazolate Frameworks

Hai-Xia Zhang, Min Liu, Guilan Xu, Liyang Liu, and Jian Zhang\*

State Key Laboratory of Structural Chemistry, Fujian Institute of Research on the Structure of Matter, Chinese Academy of Sciences, Fuzhou, Fujian 350002, P. R. China, E-mail: [zhj@fjirsm.ac.cn](mailto:zhj@fjirsm.ac.cn)

**Materials and Instrumentation.** All reagents were purchased commercially and used without further purification. All Powder X-ray diffraction (PXRD) analyses were recorded on a Rigaku Dmax2500 diffractometer with Cu K $\alpha$  radiation ( $\lambda = 1.54056 \text{ \AA}$ ) with a step size of  $0.05^\circ$ . Thermal stability studies were carried out on a NETSCHZ STA-449C thermoanalyzer with a heating rate of  $10^\circ\text{C}/\text{min}$  under an N<sub>2</sub> atmosphere. Single crystal X-ray diffraction data for BIF-24 was collected on a XCalibur E charge coupled device diffractometer equipped with confocal-monochromated Mo KR radiation ( $\lambda = 0.71073 \text{ \AA}$ ) at 273K.

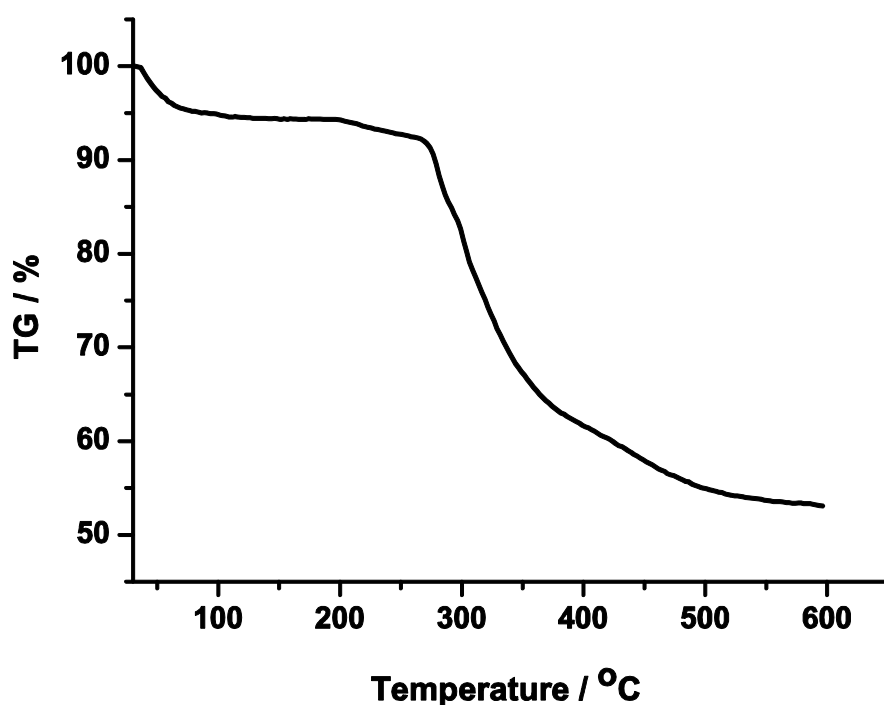

Figure S1. The TGA plot of BIF-41.

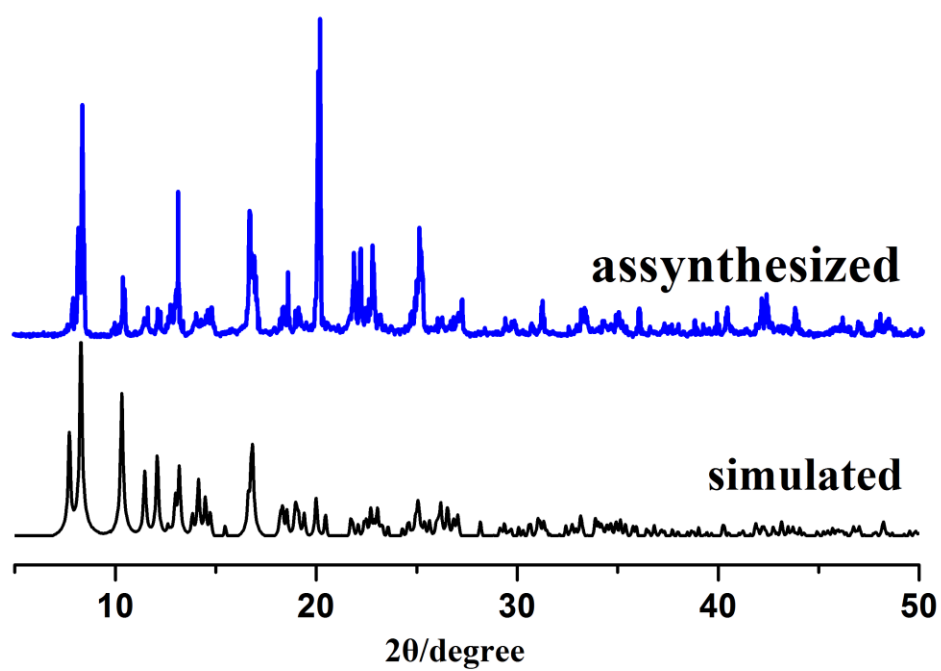

*Figure S2.* The Powder XRD patterns of **BIF-41**

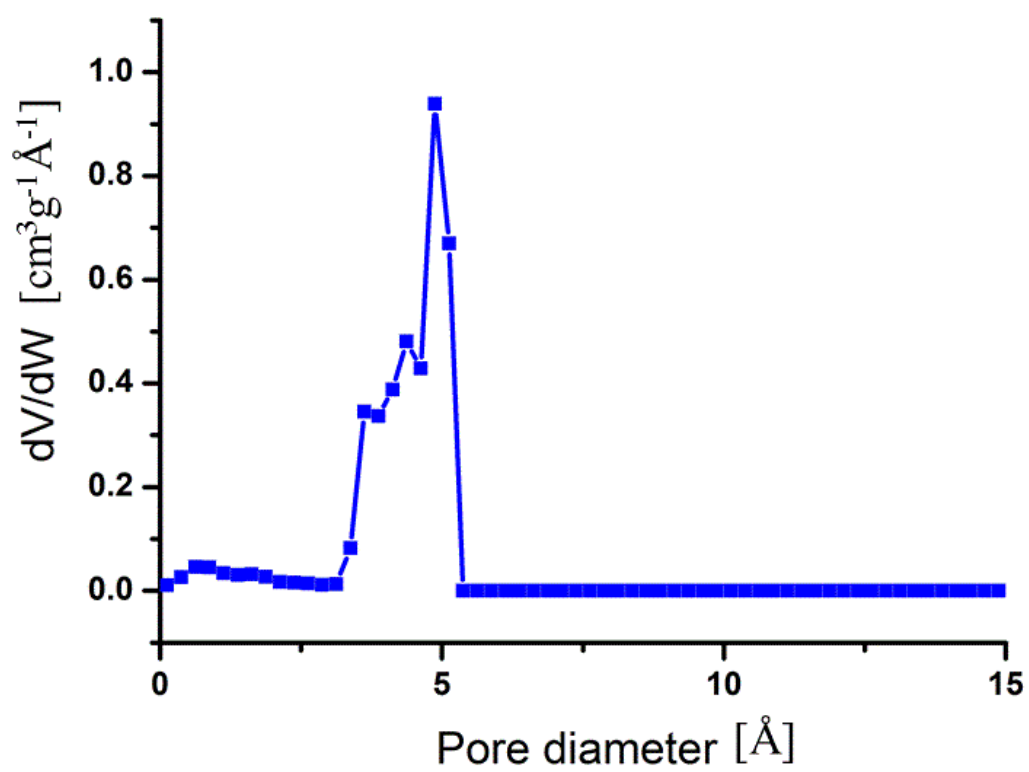

*Figure S3.* Pore size distribution curves for **BIF-41** calculated by Poreblazer

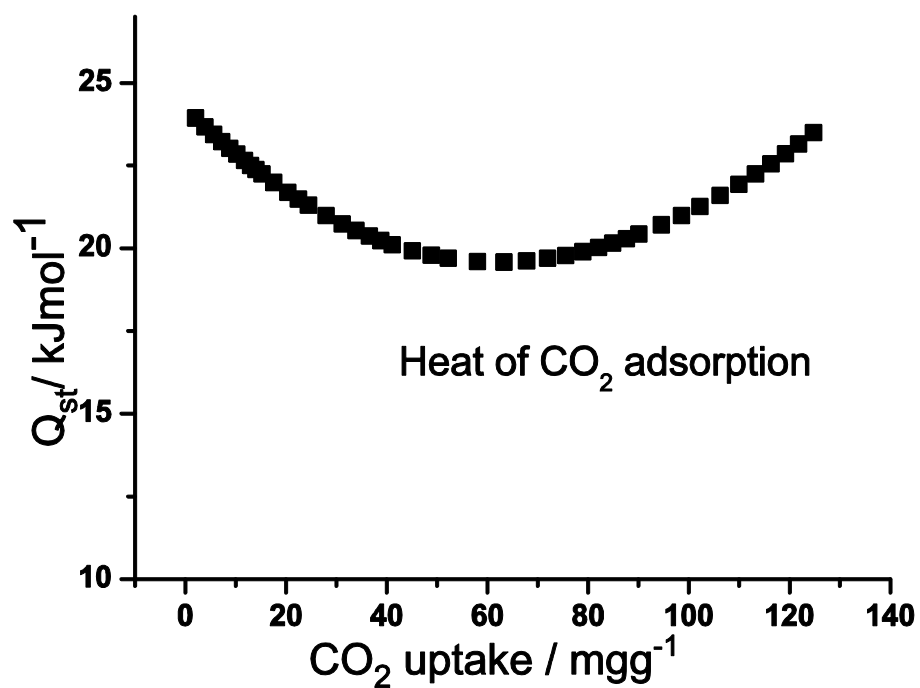

Figure S4. The Isostatic heat of CO<sub>2</sub> adsorption for **BIF-41** estimated by the virial equation.

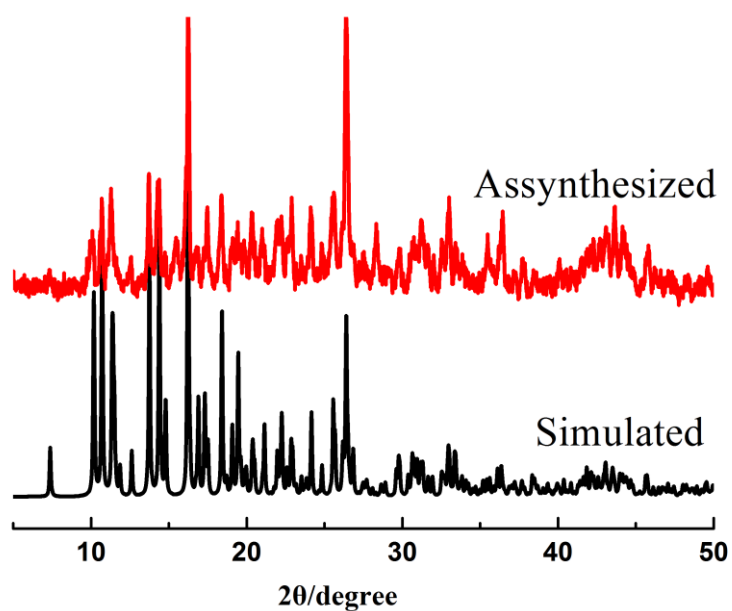

Figure S5. The Powder XRD patterns of **BIF-42**

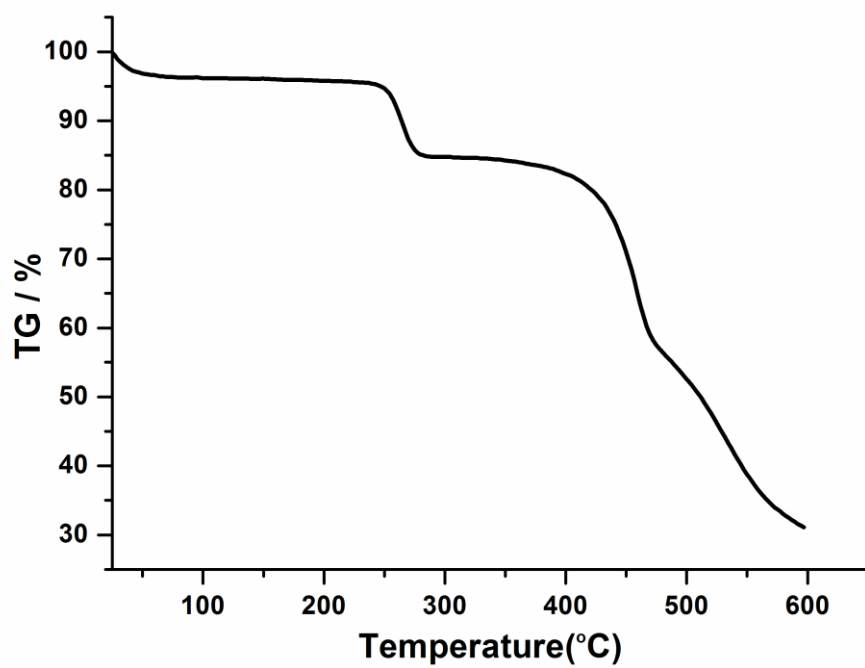

*Figure S6.* The TGA plot of **BIF-42**.
